# Supplementary material for: Effects of probiotic supplementation on gastrointestinal motility, inflammation, motor and non-motor symptoms in Parkinson's disease: a meta-analysis of randomized controlled trials
Source: Research Square preprint supplement (doi:10.21203/rs.3.rs-2461162/v1), 2023-01-16
Supplement: Supplementary file 2 [file cdc28118d6f2442b2c55e848.docx]

**Supplementary Material S3. Funnel plot to detect publication bias**

| (A) Gastrointestinal Motility | (B) Stool Type- Bristol Stool Scale |
| --- | --- |
| (C) Inflammation marker | (D) Antioxidant marker |
| (E) Diabetes risk | (F) Dyslipidemia risk |
| (G) Unified Parkinson's Disease Rating Scale (UPDRS)-Part III | (H) Parkinson’s disease Questionnaire (PDQ-39) |
| (I) Hamilton Anxiety Rating Scale(HAMA) | (J) Hamilton Depression Rating Scale (HAMD) |
| (K) Sub group analysis |  |
